# Supplementary material
Source: HighWire-hosted journal article supplement (https://www.cmaj.ca/highwire/filestream/150080/field_highwire_adjunct_files/1/230542-res-10-at.pdf)
Supplement: 230542-res-10-at.pdf [file 230542-res-10-at.pdf]

**Appendix 10: Results of fitted models**

| OUTCOME: Pain                                                                                                                     |                     |                   |                        | Random effect standard deviations and correlations |           |                  |          |          |              |              |              |
|-----------------------------------------------------------------------------------------------------------------------------------|---------------------|-------------------|------------------------|----------------------------------------------------|-----------|------------------|----------|----------|--------------|--------------|--------------|
|                                                                                                                                   | Week definition     | Number of studies | Number of observations | Range of observed weeks                            | FP powers | Study (constant) | Week1    | Week2    | Study, Week1 | Study, Week2 | Week1, Week2 |
| <i>Primary analyses</i>                                                                                                           |                     |                   |                        |                                                    |           |                  |          |          |              |              |              |
| Acute                                                                                                                             | Uncorrected         | 31                | 103                    | 0 to 52                                            | -1 -1     | 10.07786         | 13.94761 | 13.94761 | NE           | NE           | NE           |
| Pooled pain score = 20.37667 + 35.17273 * (Week + 1) <sup>(-1)</sup> + 1.927829 * (Week + 1) <sup>(-1)</sup> * ln (Week + 1)      |                     |                   |                        |                                                    |           |                  |          |          |              |              |              |
| Subacute                                                                                                                          | Uncorrected         | 10                | 27                     | 0 to 52                                            | -0.5 -0.5 | 22.21845         | 12.04136 | 12.04136 | -0.91737     | -0.86213     | 0.58921      |
| Pooled pain score = 46.18799 + 16.813208 * (Week + 1) <sup>(-0.5)</sup> - 31.52878 * (Week + 1) <sup>(-0.5)</sup> * ln (Week + 1) |                     |                   |                        |                                                    |           |                  |          |          |              |              |              |
| Persistent                                                                                                                        | Uncorrected         | 3                 | 7                      | 0 to 52                                            | 0         | 16.35877         | 1.127073 | NE       | -1           | NE           | NE           |
| Pooled pain score = 55.61477 - 3.85617 * ln (Week + 1)                                                                            |                     |                   |                        |                                                    |           |                  |          |          |              |              |              |
| Acute                                                                                                                             | Inception corrected | 25                | 84                     | 0.15 to 57.3                                       | -1 -1     | 13.47481         | 72.20967 | 49.67608 | NE           | NE           | NE           |
| Pooled pain score = 20.38864 + 116.56659 * (Week + 1) <sup>(-1)</sup> - 28.94434 * (Week + 1) <sup>(-1)</sup> * ln (Week + 1)     |                     |                   |                        |                                                    |           |                  |          |          |              |              |              |
| Subacute                                                                                                                          | Inception corrected | 7                 | 18                     | 6 to 59.4                                          | -2 -2     | 10.20384         | 436.5065 | 343.3817 | NE           | NE           | NE           |
| Pooled pain score = 36.01506 + 6829.3788 * (Week) <sup>(-2)</sup> - 2895.1184 (Week) <sup>(-2)</sup> * ln (Week)                  |                     |                   |                        |                                                    |           |                  |          |          |              |              |              |
| Persistent                                                                                                                        | Inception corrected | 3                 | 7                      | 12.9 to 79.7                                       | 0         | 34.30757         | 5.728624 | NE       | NE           | NE           | NE           |
| Pooled pain score = 93.95325 - 12.72855 * ln (Week + 1)                                                                           |                     |                   |                        |                                                    |           |                  |          |          |              |              |              |

**Sensitivity Analysis 1: Studies with participants excluding leg pain/sciatica**

|                                                                                                                                   |                     |    |    |              |           |          |          |          |          |          |         |
|-----------------------------------------------------------------------------------------------------------------------------------|---------------------|----|----|--------------|-----------|----------|----------|----------|----------|----------|---------|
| Acute                                                                                                                             | Uncorrected         | 12 | 34 | 0 to 52      | -2 -2     | 9.887039 | 12.99734 | 172.532  | NE       | NE       | NE      |
| Pooled pain score = $20.41124 + 36.11315 * (\text{Week} + 1)^{(-2)} + 26.64243 * (\text{Week} + 1)^{(-2)} * \ln(\text{Week} + 1)$ |                     |    |    |              |           |          |          |          |          |          |         |
| Subacute                                                                                                                          | Uncorrected         | 3  | 9  | 0 to 54      | 0 -0.5    | 4.019173 | 4.840804 | 6.814654 | 1        | -1       | -1      |
| Pooled pain score = $27.79144 - 51.15997 * \ln(\text{Week} + 1) + 32.76466 * (\text{Week} + 1)^{(-0.5)}$                          |                     |    |    |              |           |          |          |          |          |          |         |
| Persistent                                                                                                                        | Uncorrected         | 2  | 5  | 0 to 52      | NE        | NE       | NE       | NE       | NE       | NE       | NE      |
| Model not fitted due to sample size                                                                                               |                     |    |    |              |           |          |          |          |          |          |         |
| Acute                                                                                                                             | Inception corrected | 11 | 32 | 0.15 to 52.7 | -1 1      | 25.71545 | 72.94368 | 0.39809  | NE       | NE       | NE      |
| Pooled pain score = $1.646697 + 114.512 * (\text{Week} + 1)^{(-1)} + 0.05852 * (\text{Week} + 1)$                                 |                     |    |    |              |           |          |          |          |          |          |         |
| Subacute                                                                                                                          | Inception corrected | 3  | 9  | 6 to 59.4    | -2 -2     | 11.37849 | NE       | NE       | NE       | NE       | NE      |
| Pooled pain score = $31.70568 + 10658.71 * (\text{Week} + 1)^{(-2)} - 4568.235 * (\text{Week} + 1)^{(-2)} * \ln(\text{Week} + 1)$ |                     |    |    |              |           |          |          |          |          |          |         |
| Persistent                                                                                                                        | Inception corrected | 2  | 5  | 12.9 to 79.7 | NE        | NE       | NE       | NE       | NE       | NE       | NE      |
| Model not fitted due to sample size                                                                                               |                     |    |    |              |           |          |          |          |          |          |         |
| <b>Sensitivity Analysis 2: studies with participants aged 18 – 60 years old</b>                                                   |                     |    |    |              |           |          |          |          |          |          |         |
| Acute                                                                                                                             | Uncorrected         | 6  | 25 | 0 to 52      | -2 -2     | 5.499122 | 13.59919 | 226.6439 | NE       | NE       | NE      |
| Pooled pain score = $20.74173 + 29.11448 * (\text{Week} + 1)^{(-2)} + 55.71544 * (\text{Week} + 1)^{(-2)} * \ln(\text{Week} + 1)$ |                     |    |    |              |           |          |          |          |          |          |         |
| Subacute                                                                                                                          | Uncorrected         | 3  | 10 | 0 to 52      | -0.5 -0.5 | 63.9193  | 45.94143 | 98.14196 | -0.99684 | -0.98146 | 0.96313 |

---

|            |             |                                                                                                                                       |    |        |       |          |          |          |    |    |    |
|------------|-------------|---------------------------------------------------------------------------------------------------------------------------------------|----|--------|-------|----------|----------|----------|----|----|----|
|            |             | Pooled pain score = $60.42315 + 6.235144 * (\text{Week} + 1)^{(-0.5)} - 65.42005 * (\text{Week} + 1)^{(-0.5)} * \ln(\text{Week} + 1)$ |    |        |       |          |          |          |    |    |    |
| Persistent | Uncorrected | Model not fitted due to no observations                                                                                               |    |        |       |          |          |          |    |    |    |
| Acute      | Inception   |                                                                                                                                       |    | 0.7 to |       |          |          |          |    |    |    |
|            | corrected   | 5                                                                                                                                     | 20 | 57.2   | -2 -1 | 6.278824 | 376.8231 | 122.7733 | NE | NE | NE |
|            |             | Pooled pain score = $18.18318 + 120.2515 * (\text{Week} + 1)^{(-2)} + 43.01462 * (\text{Week} + 1)^{(-1)}$                            |    |        |       |          |          |          |    |    |    |
| Subacute   | Inception   |                                                                                                                                       |    | 6.1 to |       |          |          |          |    |    |    |
|            | corrected   | 3                                                                                                                                     | 10 | 59.1   | -2 -2 | 7.947413 | .0000186 | 672.1803 | NE | NE | NE |
|            |             | Pooled pain score = $32.08345 + 12594.86 * (\text{Week} + 1)^{(-2)} - 5032.234 * (\text{Week} + 1)^{(-2)} * \ln(\text{Weeks} + 1)$    |    |        |       |          |          |          |    |    |    |
|            | Inception   |                                                                                                                                       |    |        |       |          |          |          |    |    |    |
| Persistent | corrected   | Model not fitted due to no observations                                                                                               |    |        |       |          |          |          |    |    |    |

---

FP – fractional polynomial; ln – natural logarithm (base e); NE – not estimated as 1) not required for lowest BIC model or 2) would not converge.

| OUTCOME: Disability                                                                  |                     |                                                                                                                                        |                        | Random effect standard deviations and correlations |            |                  |          |          |              |              |              |
|--------------------------------------------------------------------------------------|---------------------|----------------------------------------------------------------------------------------------------------------------------------------|------------------------|----------------------------------------------------|------------|------------------|----------|----------|--------------|--------------|--------------|
|                                                                                      | Week definition     | Number of studies                                                                                                                      | Number of observations | Range of observed weeks                            | FP powers  | Study (constant) | Week1    | Week2    | Study, Week1 | Study, Week2 | Week1, Week2 |
| <b>Primary analyses</b>                                                              |                     |                                                                                                                                        |                        |                                                    |            |                  |          |          |              |              |              |
| Acute <sup>1</sup>                                                                   | Uncorrected         | 30                                                                                                                                     | 96                     | 0 to 52                                            | -2 -2      | 8.666543         | 13.33512 | 128.1133 | NE           | NE           | NE           |
|                                                                                      |                     | Pooled disability score = 17.1712 + 26.1946 * (Week + 1) <sup>(-2)</sup> + 118.6091 * (Week + 1) <sup>(-2)</sup> * ln (Week + 1)       |                        |                                                    |            |                  |          |          |              |              |              |
|                                                                                      |                     | 9                                                                                                                                      |                        |                                                    |            |                  |          |          |              |              |              |
| Subacute                                                                             | Uncorrected         |                                                                                                                                        | 24                     | 0 to 52                                            | -2 -2      | 12.51626         | 8.293791 | 9.92e-08 | NE           | NE           | NE           |
|                                                                                      |                     | Pooled disability score = 24.46105 + 19.46542 * (Week + 1) <sup>(-2)</sup> + 107.7813 * (Week + 1) <sup>(-2)</sup> * ln (Week + 1)     |                        |                                                    |            |                  |          |          |              |              |              |
| Persistent <sup>1</sup>                                                              | Uncorrected         | 4                                                                                                                                      | 8                      | 0 to 52                                            | 0          | 23.6969          | 0.515904 | NE       | NE           | NE           | NE           |
|                                                                                      |                     | Pooled disability score = 57.47356 + 0.4561952 * ln (Week + 1)                                                                         |                        |                                                    |            |                  |          |          |              |              |              |
| Acute                                                                                | Inception corrected | 25                                                                                                                                     | 77                     | 0.15 to 57.3                                       | -0.5 - 0.5 | 6.523719         | 38.67786 | 23.00523 | NE           | NE           | NE           |
|                                                                                      |                     | Pooled disability score = 26.50534 + 70.60417 * (Week + 1) <sup>(-0.5)</sup> - 39.60865 * (Week + 1) <sup>(-0.5)</sup> * ln (Week + 1) |                        |                                                    |            |                  |          |          |              |              |              |
|                                                                                      |                     | 6                                                                                                                                      |                        |                                                    |            |                  |          |          |              |              |              |
| Subacute                                                                             | Inception corrected |                                                                                                                                        | 15                     | 6.1 to 59.4                                        | -2 -0.5    | 12.36358         | 216.0477 | 31.61317 | NE           | NE           | NE           |
|                                                                                      |                     | Pooled disability score = 16.79713 + 444.26881 * (Week) <sup>(-2)</sup> + 52.05195 * (Week) <sup>(-0.5)</sup>                          |                        |                                                    |            |                  |          |          |              |              |              |
|                                                                                      |                     | 6                                                                                                                                      |                        |                                                    |            |                  |          |          |              |              |              |
| Persistent                                                                           | Inception corrected | 3                                                                                                                                      | 7                      | 12.9 to 79.7                                       | 0          | 53.30313         | 8.503521 | NE       | NE           | NE           | NE           |
|                                                                                      |                     | Pooled disability score = 100.8367 - 15.9655 * ln (Week + 1)                                                                           |                        |                                                    |            |                  |          |          |              |              |              |
|                                                                                      |                     | 3                                                                                                                                      |                        |                                                    |            |                  |          |          |              |              |              |
| <b>Sensitivity Analysis 1: Studies with participants excluding leg pain/sciatica</b> |                     |                                                                                                                                        |                        |                                                    |            |                  |          |          |              |              |              |
| Acute                                                                                | Uncorrected         | 11                                                                                                                                     | 32                     | 0 to 52                                            | -2 -2      | 3.584278         | 10.94346 | 103.7918 | NE           | NE           | NE           |

|                                                                                 |                     |                                                                                                                                        |    |              |         |          |         |          |         |         |         |
|---------------------------------------------------------------------------------|---------------------|----------------------------------------------------------------------------------------------------------------------------------------|----|--------------|---------|----------|---------|----------|---------|---------|---------|
|                                                                                 |                     | Pooled disability score = $12.42407 + 31.4524 * (\text{Week} + 1)^{(-2)} + 50.8484 * (\text{Week} + 1)^{(-2)} * \ln(\text{Week} + 1)$  |    |              |         |          |         |          |         |         |         |
| Subacute                                                                        | Uncorrected         | 3                                                                                                                                      | 8  | 0 to 52      | -2 -0.5 | 15.31629 | NE      | NE       | NE      | NE      | NE      |
|                                                                                 |                     | Pooled disability score = $15.30678 - 21.92224 * (\text{Week} + 1)^{(-2)} + 53.66844 * (\text{Week} + 1)^{(-0.5)}$                     |    |              |         |          |         |          |         |         |         |
| Persistent                                                                      | Uncorrected         | 2                                                                                                                                      | 5  | 0 to 52      |         |          |         |          |         |         |         |
|                                                                                 |                     | Model not fitted due to small number of studies                                                                                        |    |              |         |          |         |          |         |         |         |
| Acute                                                                           | Inception corrected | 10                                                                                                                                     | 28 | 0.15 to 52.7 | -2 -2   | 4.765257 | 9.20263 | 155.9492 | NE      | NE      | NE      |
|                                                                                 |                     | Pooled disability score = $10.77144 + 60.16282 * (\text{Week} + 1)^{(-2)} + 150.586 * (\text{Week} + 1)^{(-2)} * \ln(\text{Week} + 1)$ |    |              |         |          |         |          |         |         |         |
| Subacute                                                                        | Inception corrected | 3                                                                                                                                      | 8  | 6.1 to 59.4  | -2 3    | 17.39321 | NE      | NE       | NE      | NE      | NE      |
|                                                                                 |                     | Pooled disability score = $30.02852 + 1007.462 * (\text{Week} + 1)^{(-2)} - 0.0000538 * (\text{Week} + 1)^{(3)}$                       |    |              |         |          |         |          |         |         |         |
| Persistent                                                                      | Inception corrected | 2                                                                                                                                      | 5  | 12.9 to 79.7 |         |          |         |          |         |         |         |
|                                                                                 |                     | Model not fitted due to small number of studies                                                                                        |    |              |         |          |         |          |         |         |         |
| <b>Sensitivity Analysis 2: studies with participants aged 18 – 60 years old</b> |                     |                                                                                                                                        |    |              |         |          |         |          |         |         |         |
| Acute                                                                           | Uncorrected         | 6                                                                                                                                      | 22 | 0 to 52      | -2 0.5  | 1.443772 | 4.30292 | 0.71037  | 0.96533 | 0.42053 | 0.16912 |
|                                                                                 |                     | Pooled disability score = $13.64462 + 22.08746 * (\text{Week} + 1)^{(-2)} + 0.1022855 * (\text{Week} + 1)^{(-0.5)}$                    |    |              |         |          |         |          |         |         |         |
| Subacute                                                                        | Uncorrected         | 2                                                                                                                                      | 7  | 0 to 44      |         |          |         |          |         |         |         |
|                                                                                 |                     | Model not fitted due to small number of studies                                                                                        |    |              |         |          |         |          |         |         |         |
| Persistent                                                                      | Uncorrected         | Model not fitted due to no observations                                                                                                |    |              |         |          |         |          |         |         |         |
| Acute                                                                           | Inception corrected | 4                                                                                                                                      | 13 | 1.16 to 57.3 | -2 -2   | 7.648353 | 0.00047 | 122.9219 | NE      | NE      | NE      |

---

|            |                     |                                                                                                                                         |   |         |
|------------|---------------------|-----------------------------------------------------------------------------------------------------------------------------------------|---|---------|
|            |                     | Pooled disability score = $14.33847 + 122.4142 * (\text{Week} + 1)^{(-2)} + 157.2816 * (\text{Week} + 1)^{(-2)} * \ln(\text{Week} + 1)$ |   |         |
| Subacute   | Inception corrected | 2                                                                                                                                       | 7 | 8 to 52 |
|            |                     | Model not fitted due to small number of studies                                                                                         |   |         |
| Persistent | Inception corrected | Model not fitted due to no observations                                                                                                 |   |         |

---

<sup>1</sup>1 data point excluded because > 60 weeks.

FP – fractional polynomial; ln – natural logarithm (base e); NE – not estimated as 1) not required for lowest BIC model or 2) would not converge.
